# Supplementary material
Source: PubMed Central journal article supplement (PMC9613614)
Supplement: NIHMS1834408-supplement-Suppl_figs___tables.pdf [file NIHMS1834408-supplement-Suppl_figs___tables.pdf]

**Supplementary Figures and Tables**  
**The Ephrin B2 Receptor Tyrosine Kinase is a Regulator of Proto-oncogene MYC  
and Molecular Programs Central to Barrett's Neoplasia**

Srividya Venkitachalam, Deepak Babu, Durgadevi Ravillah, Ramachandra M. Katabathula, Peronne Joseph, Salendra Singh, Bhavatharini Udhayakumar, Yanling Miao, Omar Martinez-Uribe, Joyce A. Hogue, Adam M. Kresak, Dawn Dawson, Thomas LaFramboise, Joseph E. Willis, Amitabh Chak, Katherine S. Garman, Andrew E. Blum, Vinay Varadan, Kishore Guda

**Supplementary Figures**

**Fig. S1.** InFlo-derived EphB2 sub-network activity in primary tissues

**Fig. S2.** Signaling networks modulated by EPHB2 in BE/EAC cell lines

**Fig. S3.** EphB2 modulates FOXA2 and MUC1 expression in BE cells

**Fig. S4.** EphB2-mediated modulation of FOXA2 in BE cells is potentially dependent on MYC

**Fig. S5.** Effects of MEK inhibitor in EphB2-reconstituted EAC cells

**Supplementary Tables**

**Table S1.** Sample distribution in the discovery RNASeq Cohort

**Table S2.** Sample distribution in the validation cohort

**Table S3.** Mass Spectrometry analysis

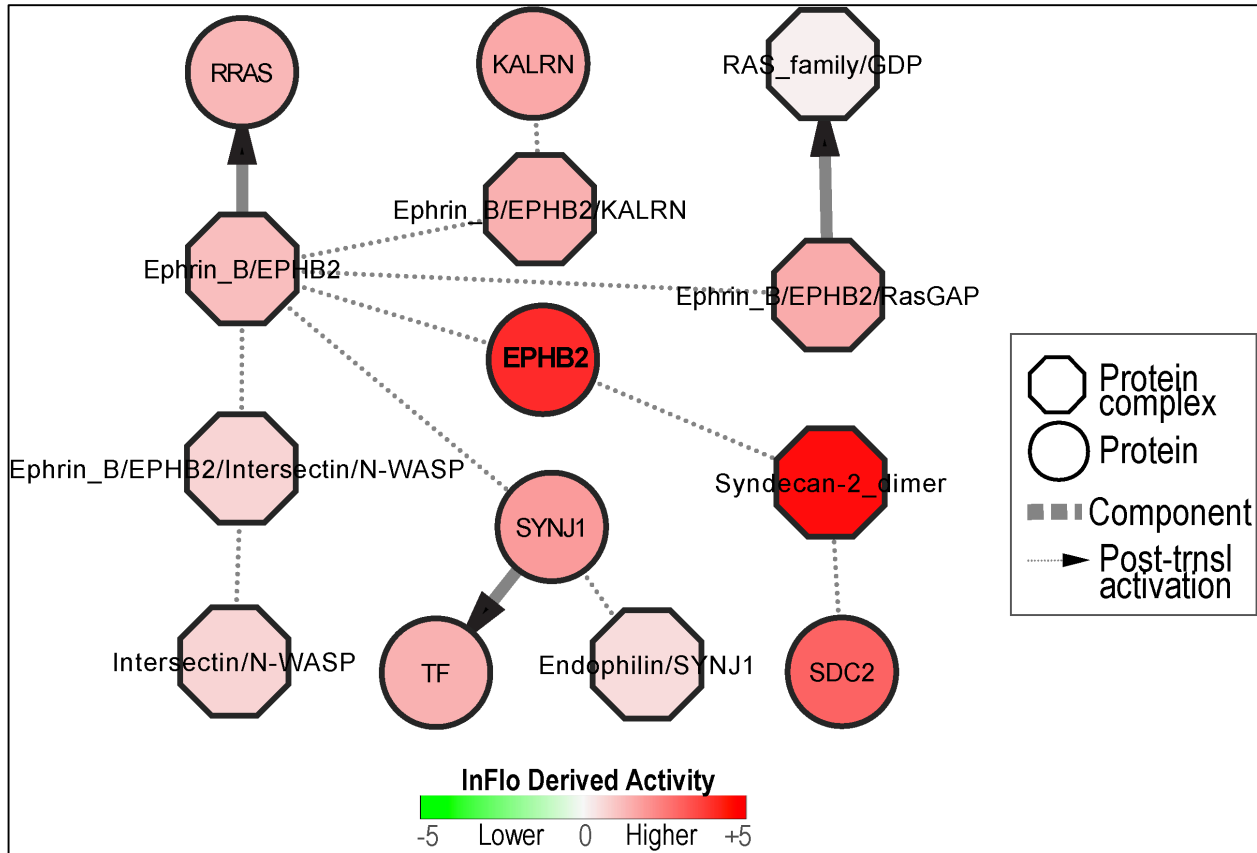

**Fig. S1. InFlo-derived EphB2 sub-network activity in primary tissues.** InFlo-based assessment of the differential activities of EphB2 signaling network components in primary NDSBM/EAC biopsy tissues. Plotted are EphB2 signaling network components showing significant differential activation in NDSBM/EAC vs. normal SQ or GAST (Wilcoxon P-Value  $\leq 0.05$ ), and their regulatory relationships. Node colors correspond to the average change in InFlo-inferred activity between NDSBM/EAC and SQ/GAST with red indicating upregulation and green indicating downregulation in NDSBM/EAC. Post-trnsl activation refers to post-translational regulation of the target. Note the broad activation of signaling components in the neighborhood of the EphB2 node suggesting activation of this pathway in BE/EAC.

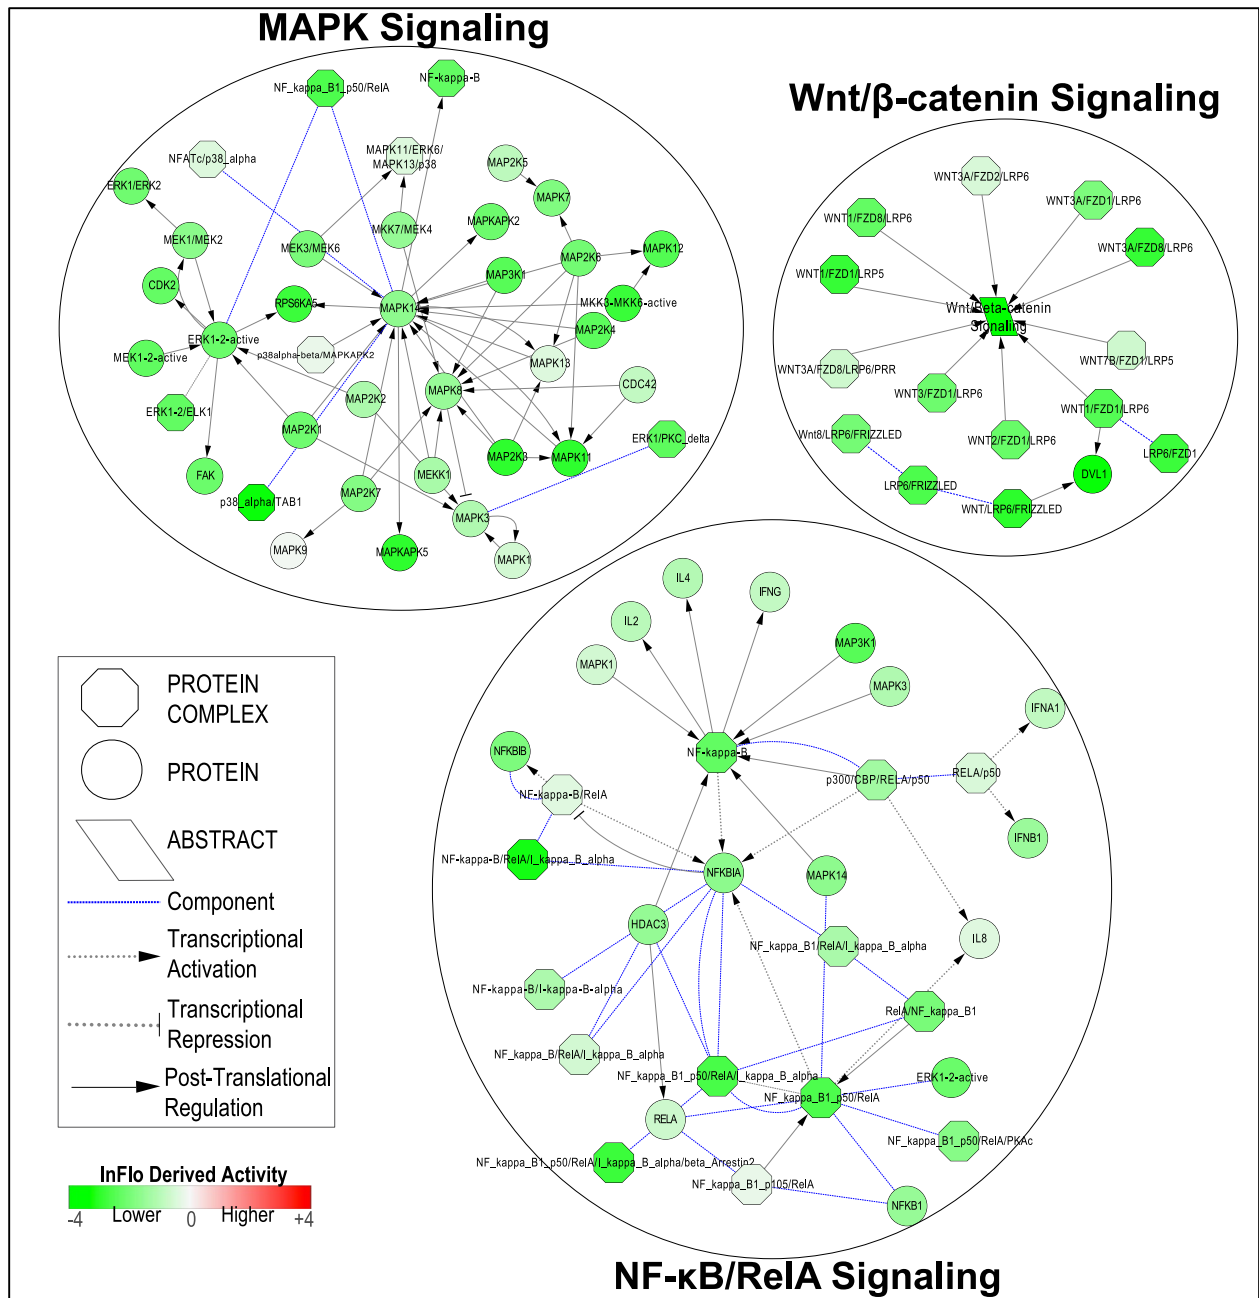

**Fig. S2. Signaling networks modulated by EphB2 in BE/EAC cell lines.** InFlo-based analysis of whole transcriptome RNASeq performed on EAC (SKGT4) and dysplastic-BE (CP-D) cells revealing significant alterations in signaling-network activities and their transcriptional targets in *EPHB2*-siRNA treated cells, compared to non-targeting Control siRNA. Shown are the consensus major signaling networks (NF- $\kappa$ B/RelA, Wnt/ $\beta$ -catenin, MAPK) associated with BE, deregulated in both EAC and BE cells upon *EPHB2* knockdown. Other significantly-altered networks are provided below (**Fig. S2 continued**).

Fig. S2 continued..

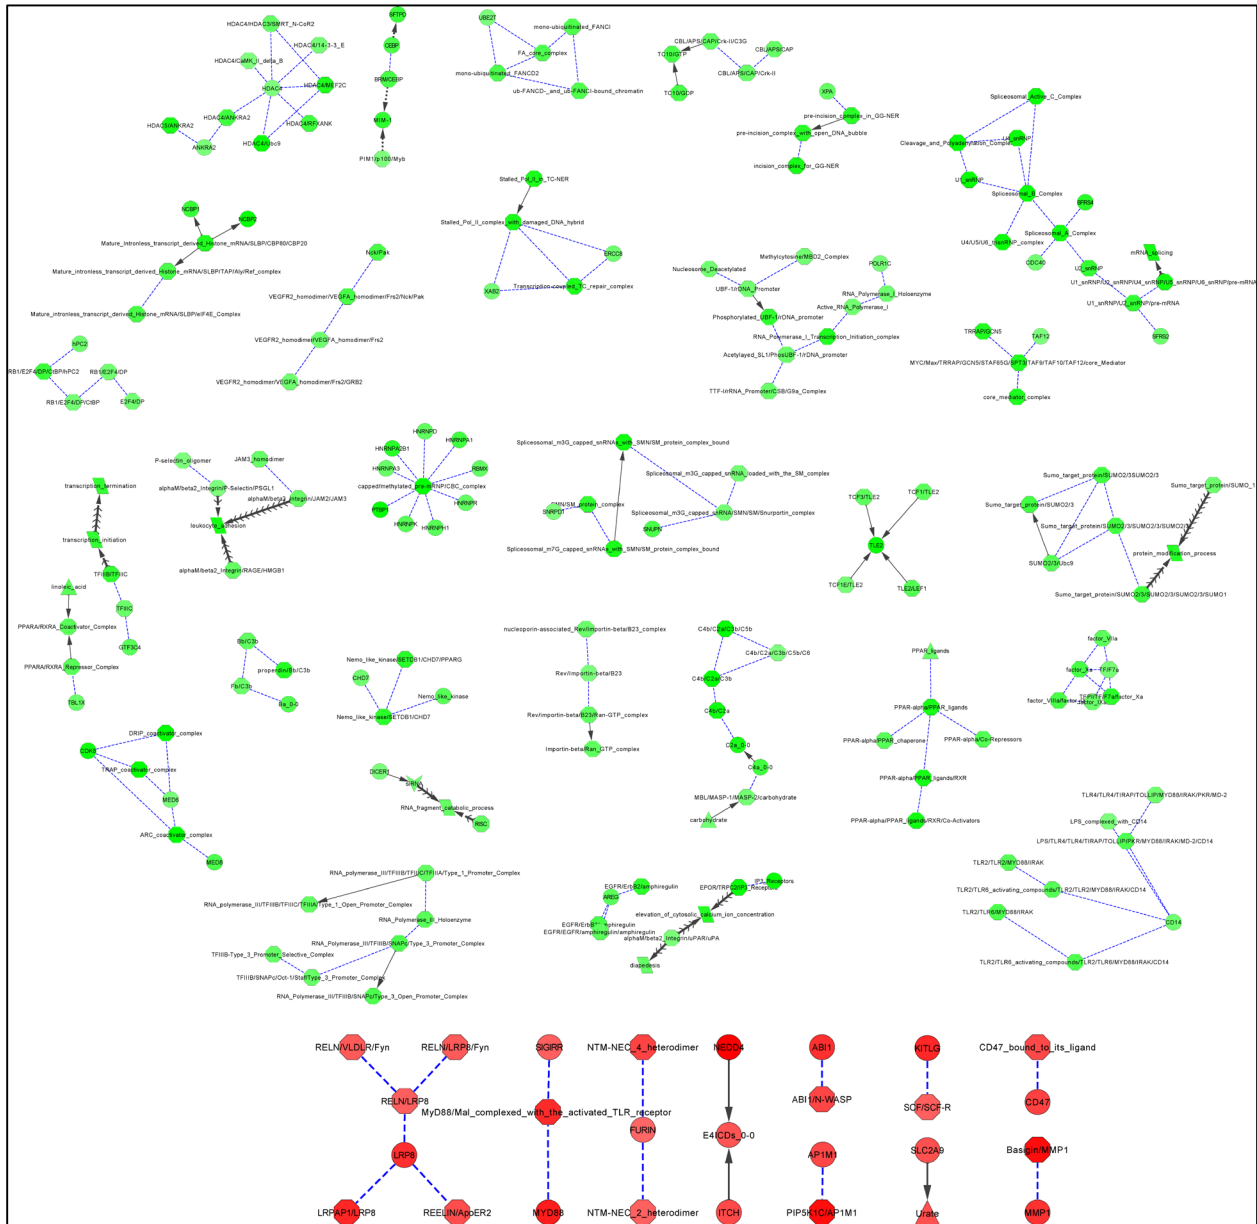

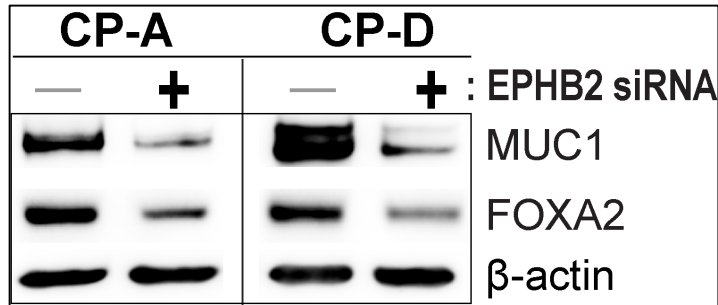

**Fig. S3. EphB2 modulates FOXA2 and MUC1 expression in BE cells.** BE metaplasia (CP-A) and dysplasia (CP-D) cell lines were treated with *EPHB2*-siRNA (+) or control-siRNA (-). Western Blot images depict protein levels of BE-associated intestinal metaplasia/columnar differentiation markers, MUC1 and FOXA2.  $\beta$ -actin was used as a loading control. Note the reduction in MUC1 and FOXA2 protein levels upon knockdown of *EPHB2* in both CP-A and CP-D cell lines.

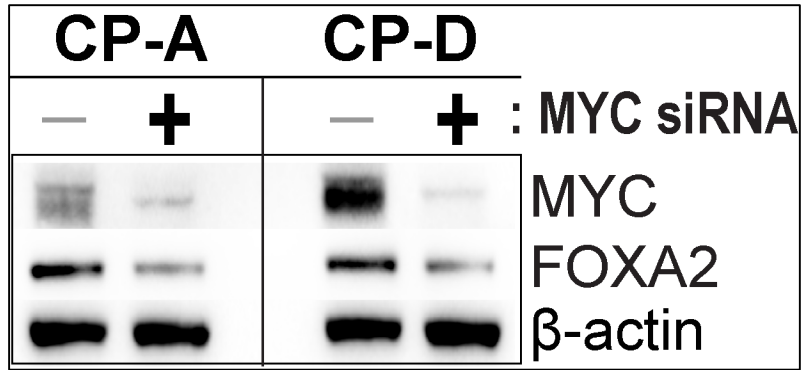

**Fig. S4. EphB2-mediated modulation of FOXA2 in BE cells is potentially dependent on MYC.** BE metaplasia (CP-A) and dysplasia (CP-D) cell lines were treated with *MYC*-siRNA (+) or control-siRNA (-). Western Blot images depict protein levels of BE-associated intestinal metaplasia/columnar differentiation marker FOXA2.  $\beta$ -actin was used as a loading control. Note the reduction in FOXA2 protein levels upon knockdown of *MYC* in both CP-A and CP-D cell lines.

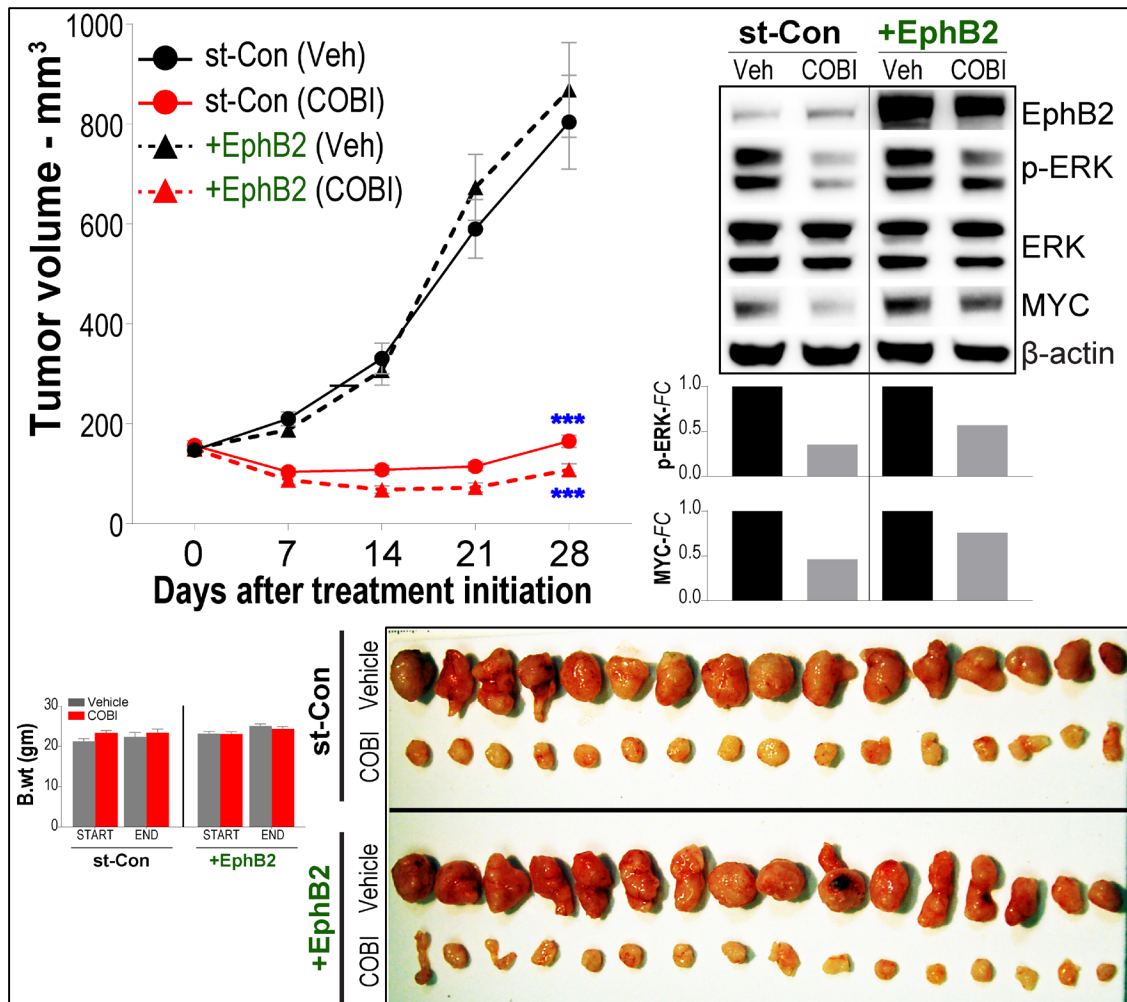

**Fig. S5. Effects of MEK inhibitor in EphB2-reconstituted EAC cells.** Tumor xenografts from EphB2-high SKGT4 EAC cells, further stably reconstituted with EphB2 (+EphB2) or stuffer control (st-Con), were established in immune-deficient mice. Mice were randomized and treated with Cobimetinib (COBI), or vehicle control, via oral gavage. Y-axis of the line graphs depict tumor volume in mm<sup>3</sup> over time (X-axis) in respective EAC xenografts. Data are plotted as mean  $\pm$  SEM, estimated using 16 established xenograft tumors at day zero per respective arm. \*\*\*( $P < 0.0005$ ) indicate significant differences in tumor volumes at the final time-point between COBI versus vehicle groups, estimated using a Student's t-test assuming unequal variances. Photographic images of harvested xenograft tumors at the final time-point from respective groups are provided below. Bar graphs depict body weight assessments of COBI and vehicle treated mice at the beginning and at the end of the study. WB images (right) depict expression levels of indicated proteins in representative tumor xenografts harvested after 1 week of treatment with either COBI or vehicle control. The bar graphs beneath the WB images show quantification of COBI-induced p-ERK and MYC protein expression changes, normalized to either total ERK or  $\beta$ -actin respectively, and presented as relative fold-change (FC) to Vehicle control arms of respective st-Con and +EphB2 groups.

**Table S1. Sample distribution in the discovery RNAseq Cohort**

| <b>Tissue Type</b>                                         | <b>Number of Samples</b> | <b>Median Age at Diagnosis (Range)</b> | <b>Gender Distribution</b> | <b>Cancer Stage Distribution</b>                                       |
|------------------------------------------------------------|--------------------------|----------------------------------------|----------------------------|------------------------------------------------------------------------|
| <b>Esophageal Adenocarcinoma (EAC) §</b>                   | 49                       | 65<br>(36 - 88)                        | 89% (Male)<br>11% (Female) | Stage I (17.9%), Stage II (19.6%), Stage III (46.4%), Stage IV (16.1%) |
| <b>Non-dysplastic Stable Barrett's Metaplasia (NDSBM)*</b> | 18                       | 56<br>(18-84)                          | 94% (Male)<br>6% (Female)  | NA                                                                     |
| <b>Normal Esophageal Squamous (nSQ) #</b>                  | 11                       | 64<br>(45-83)                          | 90% (Male)<br>10% (Female) | NA                                                                     |
| <b>Normal gastric (GAST)</b>                               | 11                       | 63<br>(36-82)                          | 82% (Male)<br>18% (Female) | NA                                                                     |
| <b>Total</b>                                               | <b>89</b>                |                                        |                            |                                                                        |

§11% of EACs were gastroesophageal junctional adenocarcinomas

\*Median surveillance of 9 years, ranging from 6 to 22 years

# Each of the 11 normal SQ samples was obtained from respective EAC patients included in the RNA sequencing



**Table S2. Sample distribution in the validation cohort**

| <b>Tissue Type</b>                                  | <b>Number of Samples</b> | <b>Median Age (Range)</b> | <b>Gender Distribution</b> | <b>Cancer Stage Distribution</b>                                       |
|-----------------------------------------------------|--------------------------|---------------------------|----------------------------|------------------------------------------------------------------------|
| <b>Esophageal Adenocarcinoma (EAC) ^</b>            | 210                      | 64<br>(34 - 89)           | 77% (Male)<br>15% (Female) | Stage I (14.1%), Stage II (16.8%), Stage III (52.2%), Stage IV (15.0%) |
| <b>Normal Esophageal Squamous (nSQ)</b>             | 461                      | 64<br>(34 - 89)           | 77% (Male)<br>15% (Female) | NA                                                                     |
| <b>Non-Dysplastic Barrett's Metaplasia (NDBM) *</b> | 133                      | 65.5<br>(36-93)           | 71% (Male)<br>34% (Female) | NA                                                                     |
| <b>BM with high-grade dysplasia (BE-HGD)</b>        | 57                       | 66<br>(46-80)             | 89% (Male)<br>11% (Female) | NA                                                                     |
| <b>Normal gastric (GAST)</b>                        | 24                       | 63<br>(36-82)             | 85% (Male)<br>15% (Female) | NA                                                                     |
| <b>Total</b>                                        | <b>885</b>               |                           |                            |                                                                        |

^13% of EACs were gastroesophageal junctional adenocarcinomas

\*Clinical follow-up information unavailable (progression status unknown) for these patients

**Table S3. Mass Spectrometry analysis**

|              | <b>Parental (IgG)<sup>a</sup></b> | <b>Parental (EphB2)<sup>b</sup></b> | <b>V5-Control (V5)<sup>c</sup></b> | <b>V5-EphB2 (IgG)<sup>d</sup></b> | <b>V5-EphB2 (V5)<sup>e</sup></b> |
|--------------|-----------------------------------|-------------------------------------|------------------------------------|-----------------------------------|----------------------------------|
| <b>EphB2</b> | <b>833,680</b>                    | <b>1,575,600,000</b>                | <b>707,050</b>                     | <b>1,000,700</b>                  | <b>6,798,200,000</b>             |

  

| <b>Gene ID</b> | <b>Accession</b> | <b>MW kDa</b> | <b>Parental (IgG)<sup>a</sup></b> | <b>Parental (EphB2)<sup>b</sup></b> | <b>V5-Control (V5)<sup>c</sup></b> | <b>V5-EphB2 (IgG)<sup>d</sup></b> | <b>V5-EphB2 (V5)<sup>e</sup></b> |
|----------------|------------------|---------------|-----------------------------------|-------------------------------------|------------------------------------|-----------------------------------|----------------------------------|
| <b>O75592</b>  | <b>MYCBP2</b>    | <b>513.63</b> | <b>0</b>                          | <b>29,608,000</b>                   | <b>0</b>                           | <b>0</b>                          | <b>380,030,000</b>               |
| P17028         | ZNF24            | 42.155        | 0                                 | 30,919,000                          | 0                                  | 0                                 | 31,294,000                       |
| Q96SL8         | FIZ1             | 51.995        | 0                                 | 13,129,000                          | 0                                  | 0                                 | 24,961,000                       |
| P41223         | BUD31            | 17            | 0                                 | 18,043,000                          | 0                                  | 0                                 | 23,596,000                       |
| Q96QZ7         | MAGI1            | 164.58        | 0                                 | 24,457,000                          | 0                                  | 0                                 | 23,028,000                       |
| O95639         | CPSF4            | 30.255        | 0                                 | 31,543,000                          | 0                                  | 0                                 | 22,196,000                       |
| P46777         | RPL5             | 34.362        | 0                                 | 9,604,900                           | 0                                  | 0                                 | 18,333,000                       |
| Q9HDC5         | JPH1             | 71.685        | 0                                 | 14,980,000                          | 0                                  | 0                                 | 17,435,000                       |
| O00148         | DDX39A           | 49.129        | 0                                 | 13,785,000                          | 0                                  | 0                                 | 14,103,000                       |
| P51148         | RAB5C            | 23.482        | 0                                 | 17,428,000                          | 0                                  | 0                                 | 12,735,000                       |
| Q9UDY2         | TJP2             | 133.96        | 0                                 | 13,092,000                          | 0                                  | 0                                 | 11,443,000                       |
| Q14739         | LBR              | 70.702        | 0                                 | 5,727,700                           | 0                                  | 0                                 | 10,244,000                       |
| Q8IX01         | SUGP2            | 120.21        | 0                                 | 5,743,100                           | 0                                  | 0                                 | 6,077,400                        |
| P16144         | ITGB4            | 202.16        | 0                                 | 3,891,800                           | 0                                  | 0                                 | 4,038,100                        |
| Q96QE3         | ATAD5            | 207.57        | 0                                 | 2,801,000                           | 0                                  | 0                                 | 1,404,100                        |

\*Values in the table indicate label-free quantitation (LFQ) intensities for EphB2 and other genes listed

<sup>a</sup> IP-MS of Parental EAC (SKGT4) cells using anti-IgG antibody

<sup>b</sup> IP-MS of Parental EAC (SKGT4) cells using anti-EphB2 antibody

<sup>c</sup> IP-MS of V5-tagged stuffer-control stable EAC (SKGT4) cells using anti-V5 antibody

<sup>d</sup> IP-MS of V5-tagged wild-type EphB2 stable EAC (SKGT4) cells using anti-IgG antibody

<sup>e</sup> IP-MS of V5-tagged wild-type EphB2 stable EAC (SKGT4) cells using anti-V5 antibody
